# Supplementary material for: Risk of Major Congenital Malformations and Exposure to Antiseizure Medication Monotherapy
Source: PubMed Central journal article supplement (PMC10949148; doi:10.1001/jamaneurol.2024.0258), 2024-03-18
Supplement: jamaneurol-e240258-s003.pdf [file jamaneurol-e240258-s003.pdf]

## **Data Sharing Statement**

Battino. Risk of Major Congenital Malformations and Exposure to Antiseizure Medication Monotherapy. *JAMA Neurol.* Published March 18, 2024. doi:10.1001/jamaneurol.2024.0258

### **Data**

**Data available:** No
